# Supplementary material
Source: Royal Society of Chemistry journal article supplement (doi:10.1039/d6ta02495e)
Supplement: d6ta02495e1.pdf [file d6ta02495e1.pdf]

## Supporting Information

### Surface decoration of Ba-enriched Fe-based air electrodes with Co-based catalysts for robust protonic ceramic electrochemical cells

Yan Liu,<sup>a,†</sup> Haoqing Lin,<sup>a,†</sup> Jingnan Zou,<sup>a</sup> Tenghui Yuan,<sup>a</sup> Zhuohao Wang,<sup>a</sup> Hang Bao,<sup>a</sup> Ali Abdelhafiz,<sup>c</sup> and Bote Zhao<sup>\*a,b</sup>

<sup>a</sup> School of Environment and Energy, South China University of Technology, Guangzhou 510006, China.

<sup>b</sup> Guangdong Provincial Key Laboratory of Atmospheric Environment and Pollution Control, Guangzhou 510006, China.

<sup>c</sup> Department of Nuclear Science and Engineering, Massachusetts Institute of Technology, 77 Mass Ave, Cambridge, MA 02139, USA.

\*Corresponding author:

Bote Zhao, E-mail: [botezhao@scut.edu.cn](mailto:botezhao@scut.edu.cn)

[†] These authors contributed equally to this work.

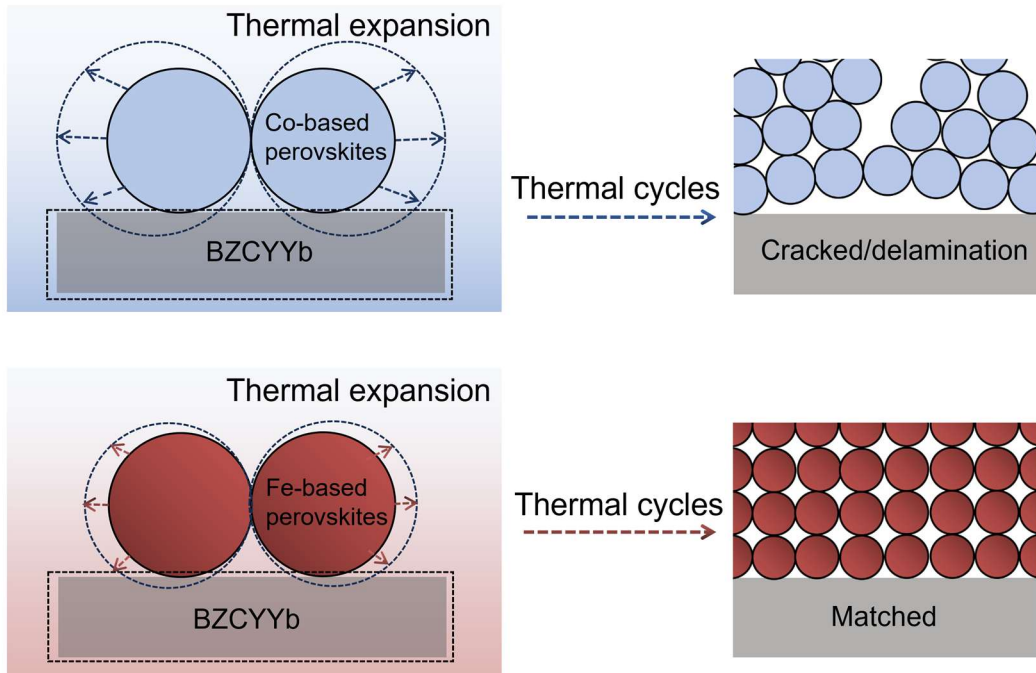

**Figure S1.** Schematic illustration of potential thermal expansion mismatch issues in PCECs.

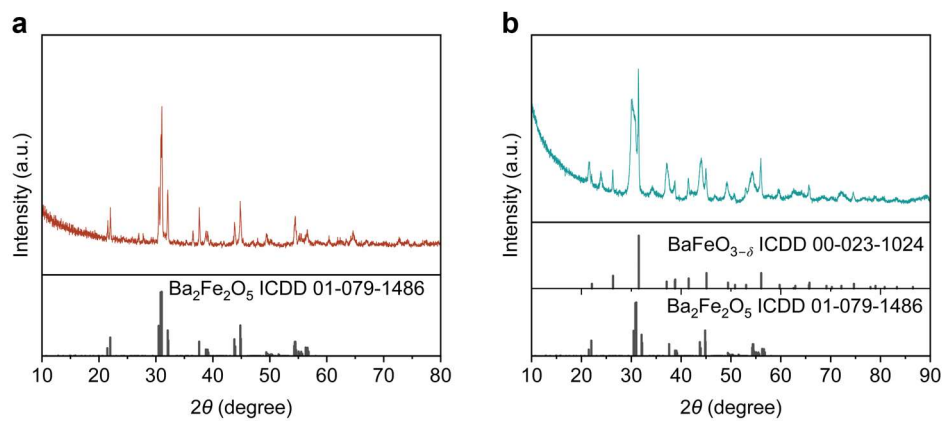

**Figure S2.** XRD patterns of (a) BF and (b)  $\text{B}_{1.02}\text{F}$  powders.

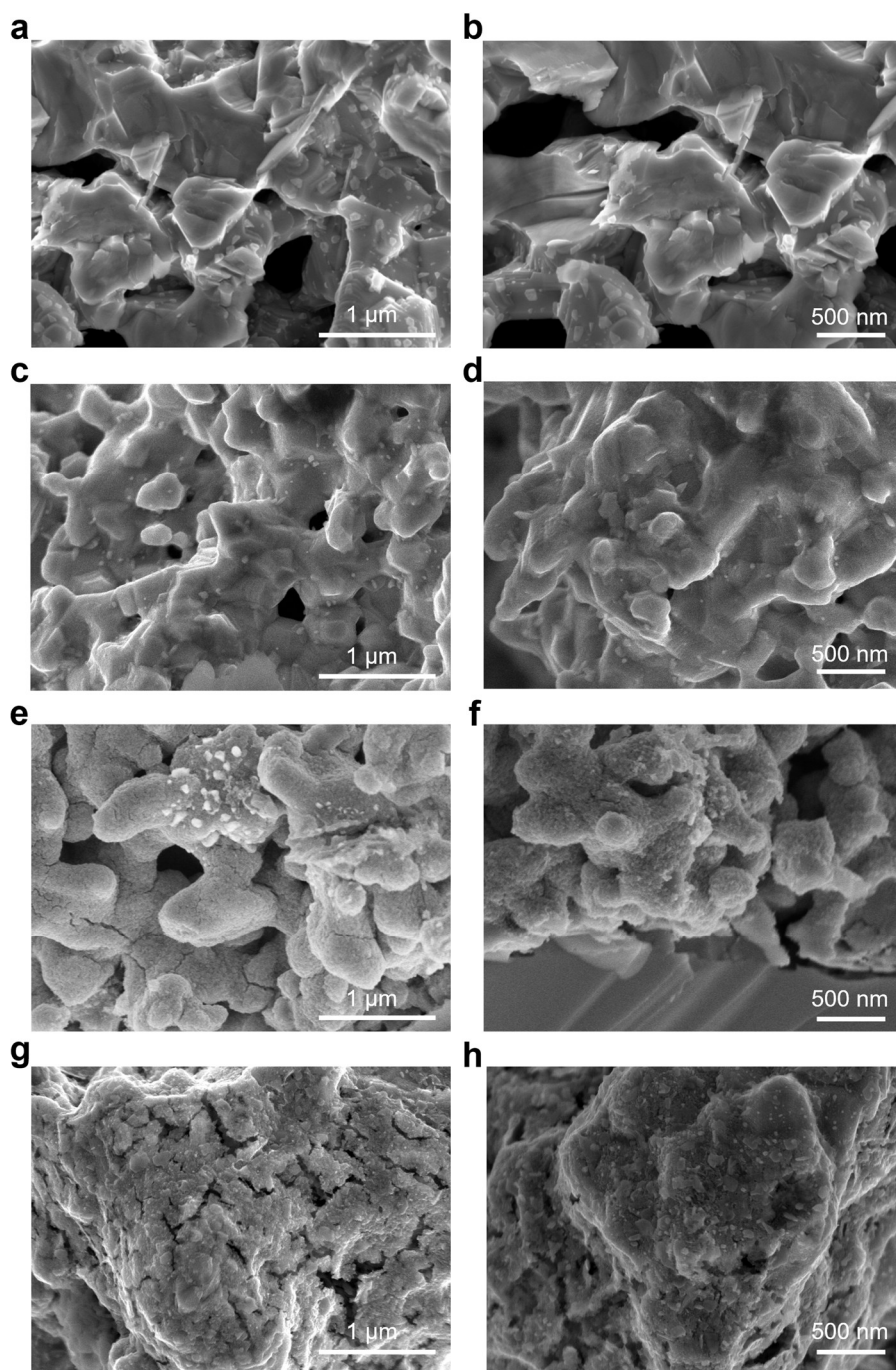

**Figure S3.** SEM images of the air electrodes. **(a, b)** bare BF; and **(c-h)** B<sub>1.02</sub>F-CC prepared with different infiltration volumes of 0.1 M Co(NO<sub>3</sub>)<sub>2</sub> precursor solution: **(c, d)** 2 μL, **(e, f)** 4 μL, and **(g, h)** 6 μL. The 2, 4, and 6 μL volumes correspond to equivalent Co<sub>3</sub>O<sub>4</sub> catalyst loadings of 1.8, 3.6, and 5.4 wt.%, respectively.

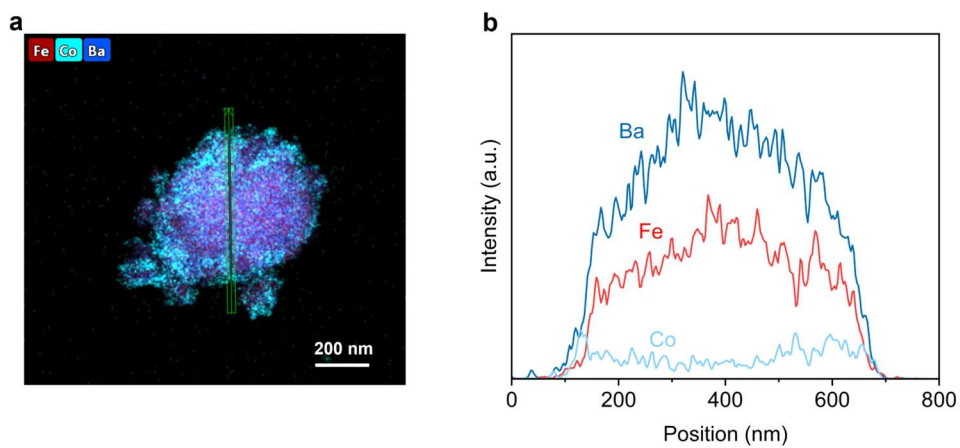

**Figure S4.** (a) EDS elemental mapping of B<sub>1.02</sub>F-CC; (b) corresponding EDS line-scan profile along the line marked in (a).

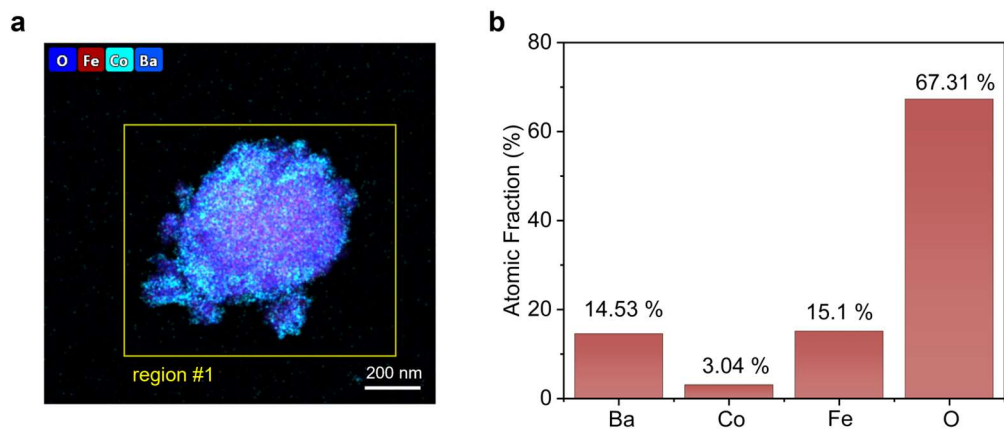

**Figure S5. (a)** EDS elemental mapping of  $B_{1.02}F-CC$ ; **(b)** atomic fractions of the region marked as region #1.

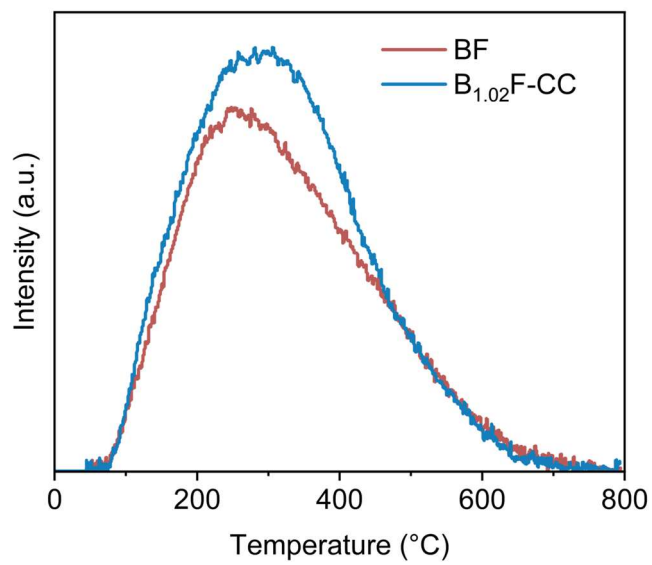

**Figure S6.** H<sub>2</sub>O-TPD profiles of BF and B<sub>1.02</sub>F-CC samples from 50 °C to 800 °C.

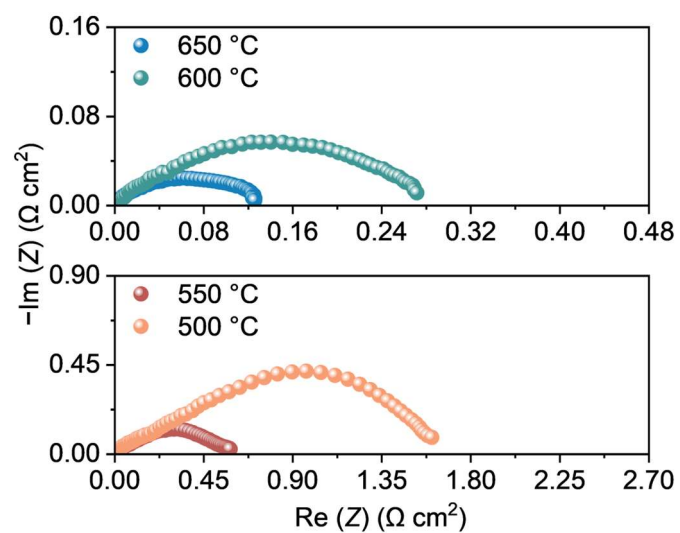

**Figure S7.** Nyquist plots of the symmetric cell with  $\text{B}_{1.02}\text{F}$  air electrode measured at different temperatures.

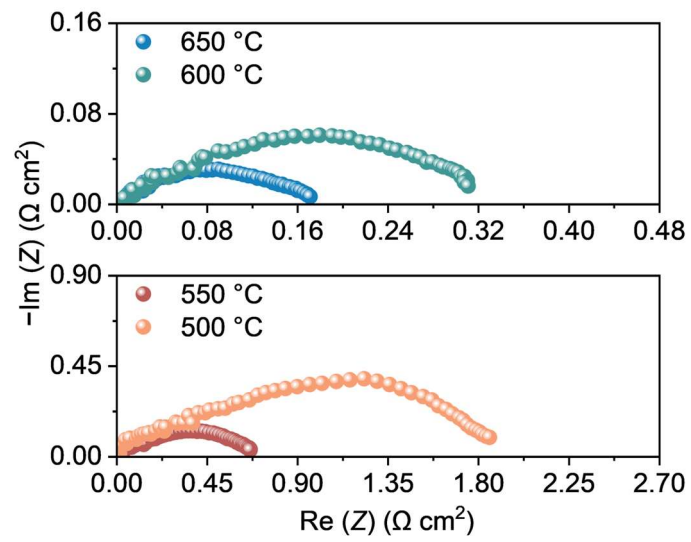

**Figure S8.** Nyquist plots of the symmetric cell with  $\text{B}_{1.02}\text{F}$ -1000 air electrode measured at different temperatures.

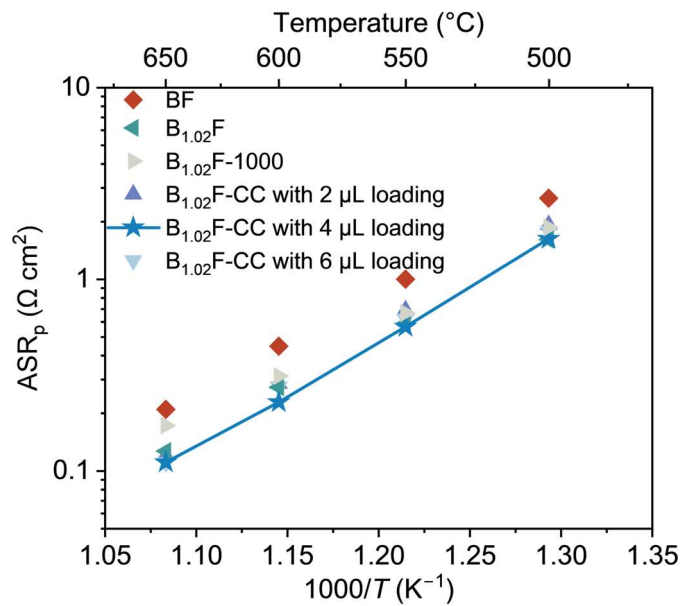

**Figure S9.** Arrhenius-type plots of  $ASR_p$  for BF,  $B_{1.02}F$ ,  $B_{1.02}F-1000$ , and  $B_{1.02}F-CC$  air electrodes prepared with different volumes of 0.1 M  $Co(NO_3)_2$  precursor solution. These infiltration volumes of 2, 4, and 6  $\mu L$  correspond to equivalent  $Co_3O_4$  mass fractions of approximately 1.8, 3.6, and 5.4 wt.%, respectively.

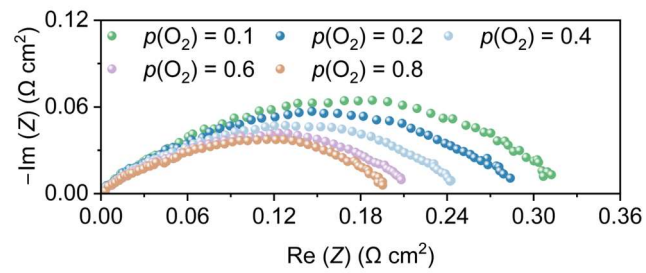

**Figure S10.** Nyquist plots of symmetric cells employing  $\text{B}_{1.02}\text{F-CC}$  air electrodes, recorded at  $600\text{ }^\circ\text{C}$  in wet air (3%  $\text{H}_2\text{O}$ ) under different  $p(\text{O}_2)$ .

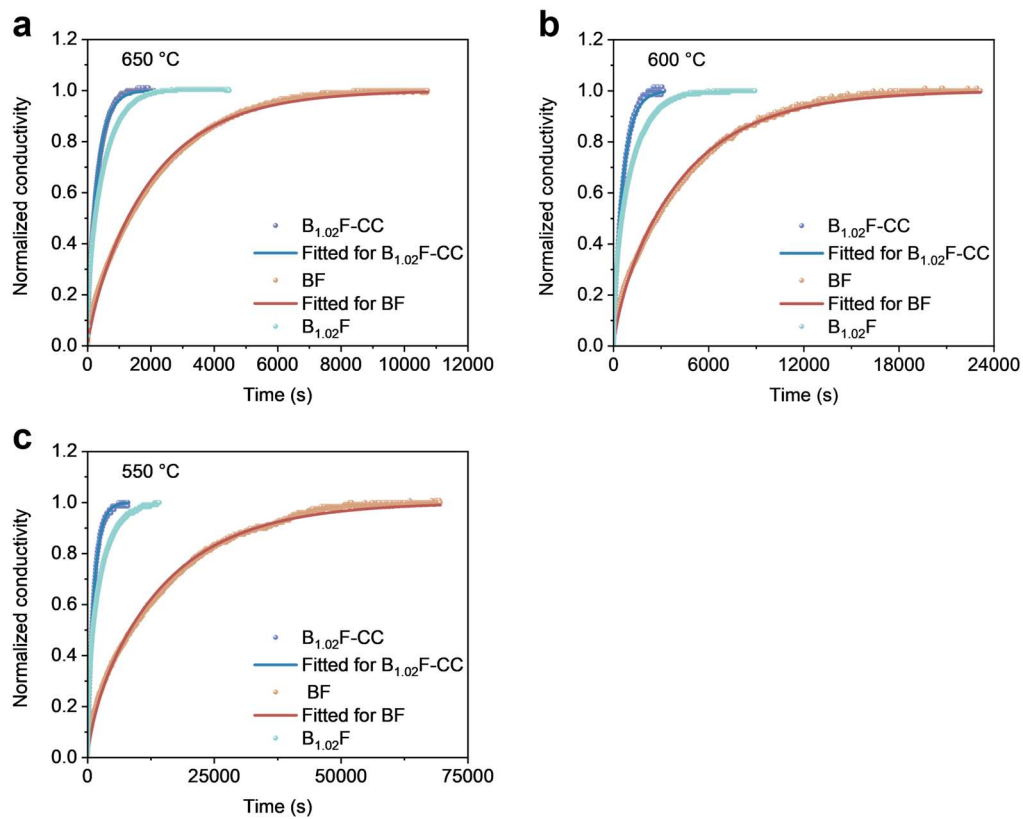

**Figure S11.** ECR curves of  $B_{1.02}F-CC$ ,  $B_{1.02}F$ , and BF recorded at **(a)** 650 °C, **(b)** 600 °C, and **(c)** 550 °C.

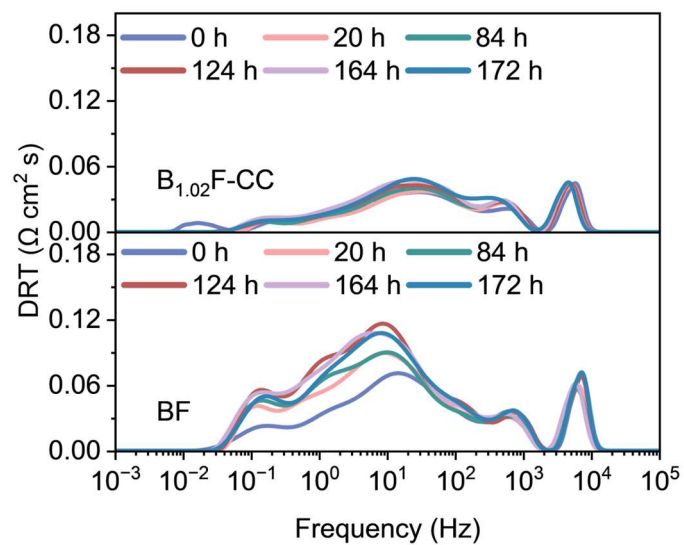

**Figure S12.** DRT analysis of  $B_{1.02}F-CC$  and  $BF$  air electrodes at various points throughout the durability test.

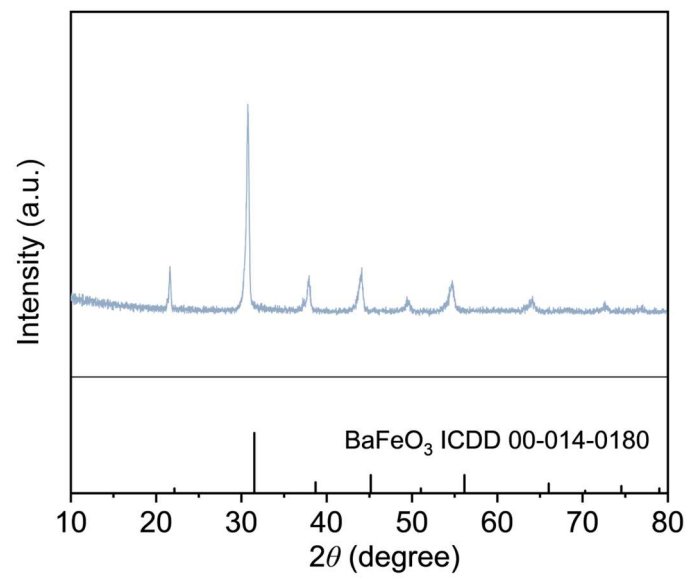

**Figure S13.** XRD pattern of BCF powder.

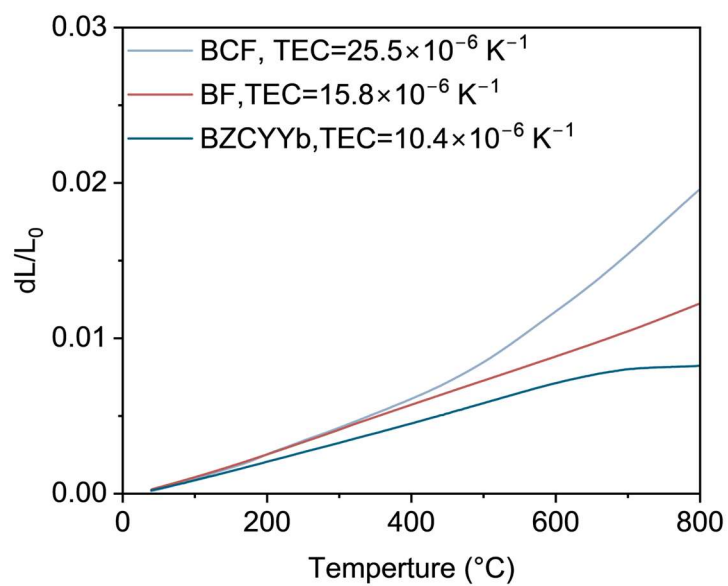

**Figure S14.** Thermal expansion curves of dense BZCYYb, BF, and BCF bars measured in air from room temperature to 800 °C.

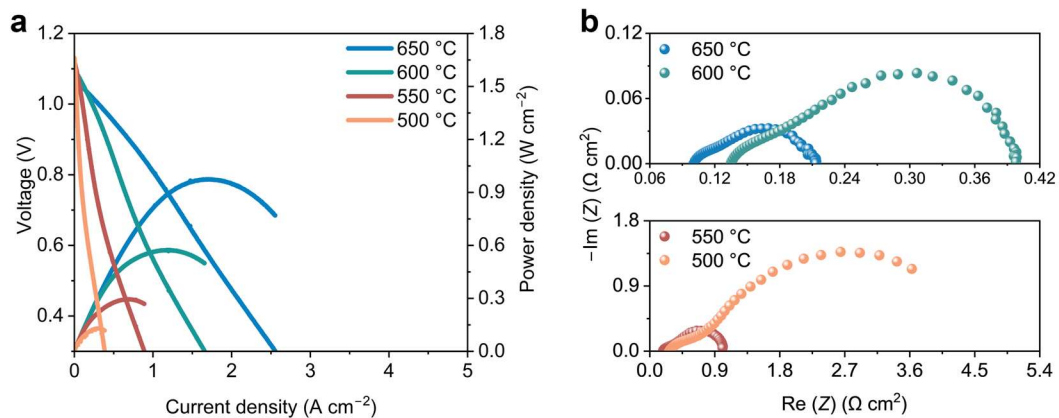

**Figure S15. Fuel-cell mode performance of the single cell with the BF air electrode at different temperatures. (a)  $I-V-P$  curves; (b) Nyquist plots measured under OCV conditions.**

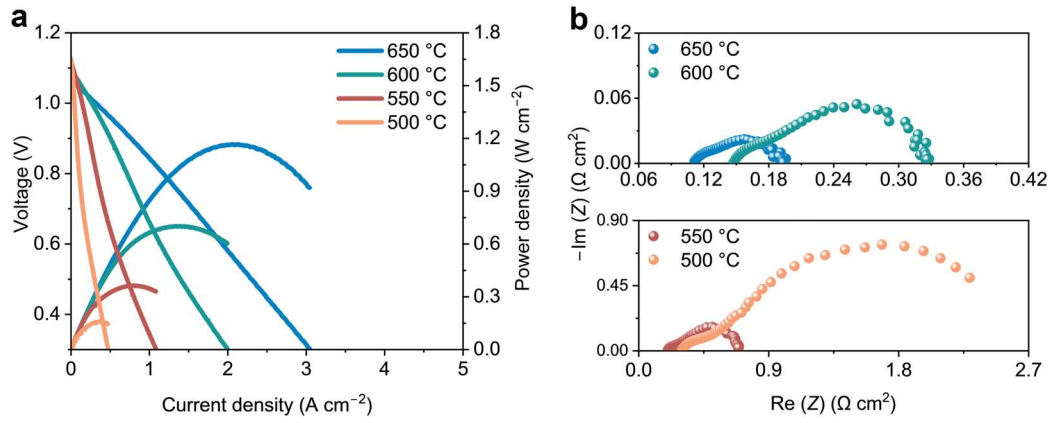

**Figure S16. Fuel-cell mode performance of the single cell with the B<sub>1.02</sub>F air electrode at different temperatures. (a) *I-V-P* curves; (b) Nyquist plots measured under OCV conditions.**

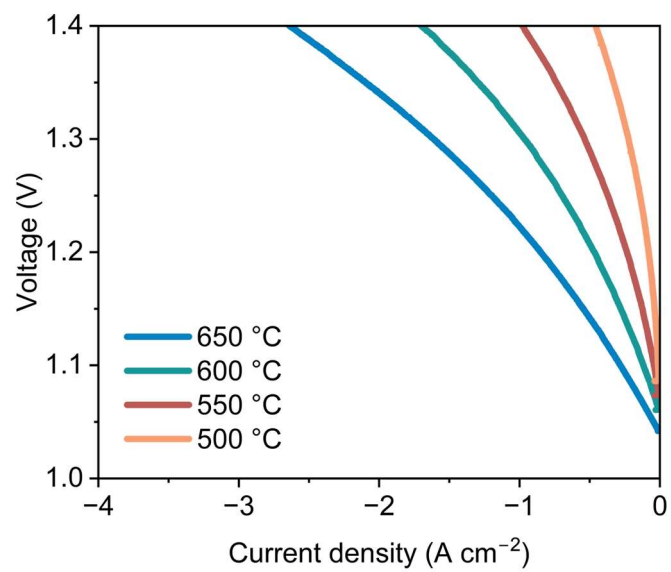

**Figure S17.** Electrolysis performance of the single cell utilizing the BF air electrode.

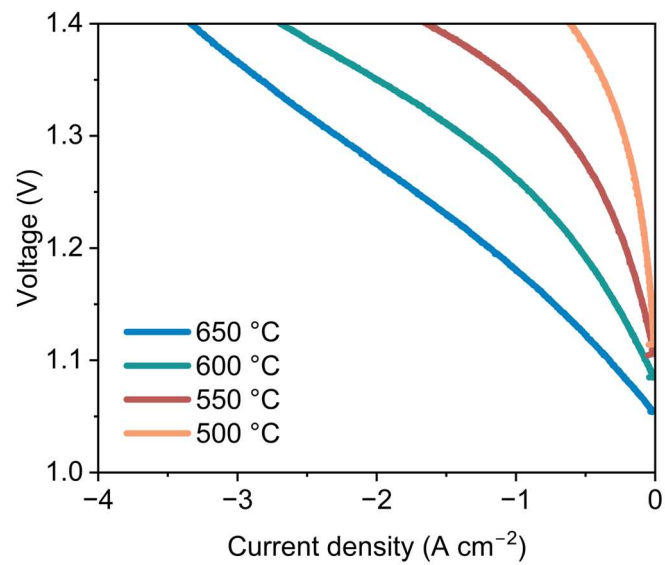

**Figure S18.** Electrolysis performance of the single cell utilizing the B<sub>1.02</sub>F air electrode.

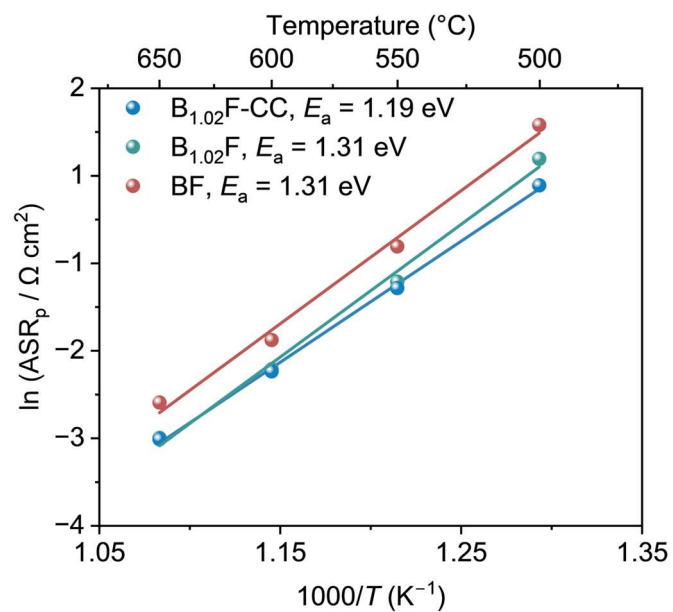

**Figure S19.** Arrhenius-type plots of ASR<sub>p</sub> for the single cell utilizing BF, B<sub>1.02</sub>F, and B<sub>1.02</sub>F-CC air electrodes.

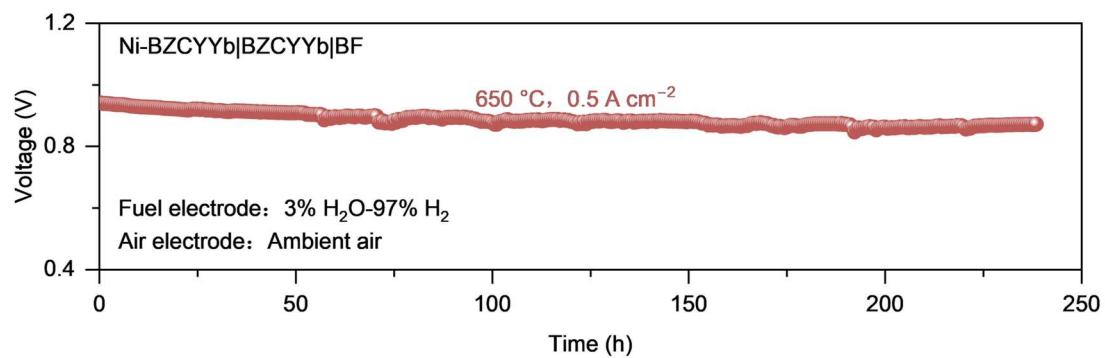

**Figure S20.** Long-term stability test of the single cell utilizing BF air electrode at 650 °C under a constant current density of 0.5 A cm<sup>-2</sup>.

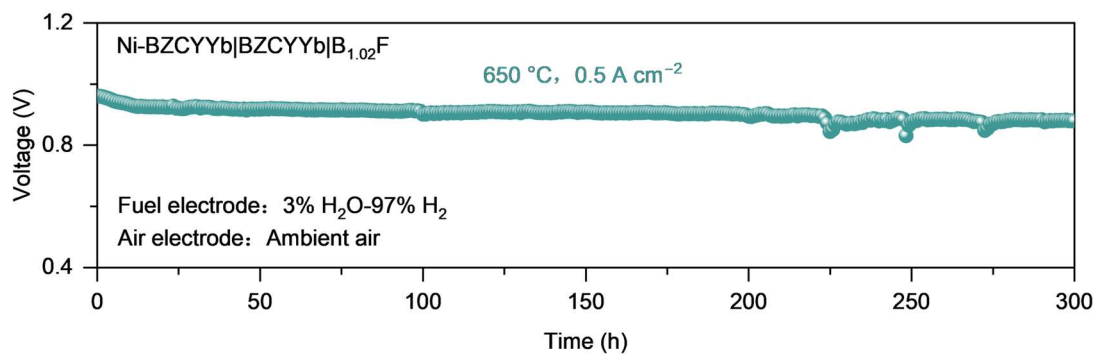

**Figure S21.** Long-term stability test of the single cell utilizing B<sub>1.02</sub>F air electrode at 650 °C under a constant current density of 0.5 A cm<sup>-2</sup>.

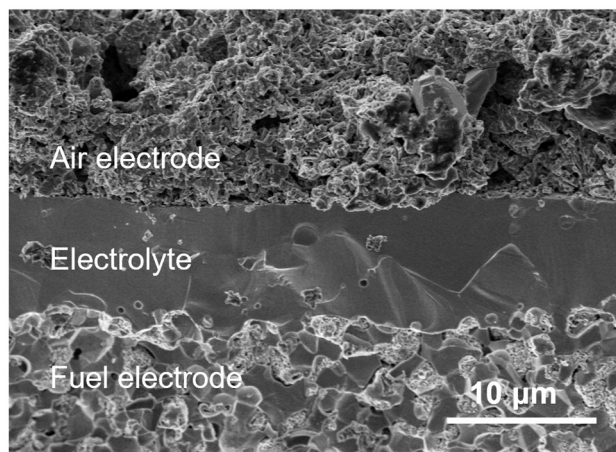

**Figure S22.** Cross-sectional SEM image of the single cell with the  $B_{1.02}F$ -CC air electrode after long-term stability test for 600 h at 650 °C in fuel-cell mode.

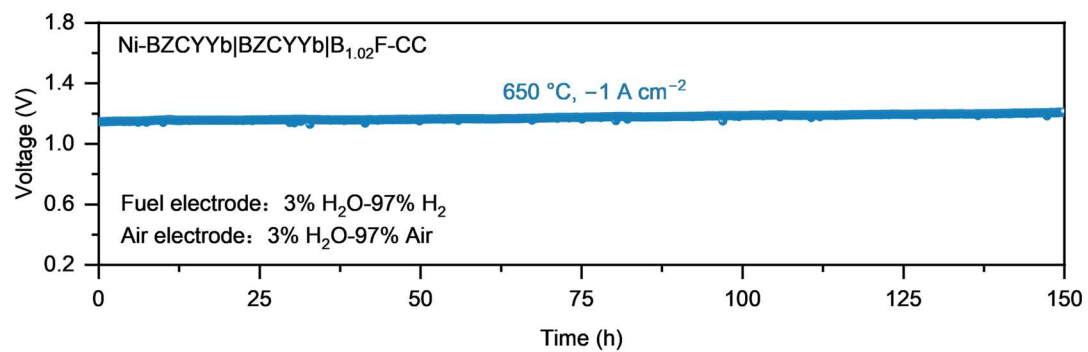

**Figure S23.** Long-term stability test of the single cell utilizing B<sub>1.02</sub>F-CC air electrode at 650 °C under a constant current density of -1 A cm<sup>-2</sup> in electrolysis mode.

**Table S1.** Summary of ASR<sub>p</sub> values for B<sub>1.02</sub>F-CC and other advanced air electrodes measured in symmetric cells.

| Air electrode                                                                                                                                                                     | ASR <sub>p</sub> (Ω cm <sup>2</sup> ) |        |        |                     | Ref.                                                                    |
|-----------------------------------------------------------------------------------------------------------------------------------------------------------------------------------|---------------------------------------|--------|--------|---------------------|-------------------------------------------------------------------------|
|                                                                                                                                                                                   | 650 °C                                | 600 °C | 550 °C | 500 °C              |                                                                         |
| B <sub>1.02</sub> F-CC                                                                                                                                                            | 0.110                                 | 0.227  | 0.562  | 1.62                | This work                                                               |
| PBSCaC<br>(Pr <sub>0.5</sub> Ba <sub>1/6</sub> Sr <sub>1/6</sub> Ca <sub>1/6</sub> CoO <sub>3-δ</sub> )                                                                           | 0.155                                 | 0.348  | 0.842  | 2.298               | <i>Energy Environ. Sci.</i> , <b>2024</b> , 17, 7782-7791 <sup>49</sup> |
| PNC-LSCF<br>(Pr <sub>2</sub> Ni <sub>0.5</sub> Co <sub>0.5</sub> O <sub>4-δ</sub> -<br>La <sub>0.6</sub> Sr <sub>0.4</sub> Co <sub>0.2</sub> Fe <sub>0.8</sub> O <sub>3-δ</sub> ) | 0.167                                 | 0.42   | 1.46   | N.A. <sup>[a]</sup> | <i>Adv. Energy Mater.</i> , <b>2025</b> , 15, 2403335 <sup>51</sup>     |
| HE-PBSLCaC<br>(High-entropy<br>Pr <sub>0.2</sub> Ba <sub>0.2</sub> Sr <sub>0.2</sub> La <sub>0.2</sub> Ca <sub>0.2</sub> CoO <sub>3-δ</sub> )                                     | 0.12                                  | 0.26   | 0.75   | 2.13                | <i>Adv. Mater.</i> , <b>2023</b> , 35, 2209469 <sup>46</sup>            |
| MCsCO-CO<br>(Mn <sub>0.9</sub> Cs <sub>0.1</sub> Co <sub>2</sub> O <sub>4-δ</sub> -Co <sub>3</sub> O <sub>4</sub> )                                                               | 0.176                                 | 0.382  | 0.984  | 2.94                | <i>Adv. Mater.</i> , <b>2024</b> , 36, 2408044 <sup>50</sup>            |
| CePLBSCaC<br>(Ce <sub>0.05</sub> Pr <sub>0.19</sub> La <sub>0.19</sub> Ba <sub>0.19</sub> Sr <sub>0.19</sub> Ca <sub>0.19</sub><br>CoO <sub>3-δ</sub> )                           | 0.13                                  | 0.29   | 0.71   | 1.99                | <i>Adv. Funct. Mater.</i> , <b>2025</b> , e25122 <sup>48</sup>          |
| PBCsC<br>(PrBa <sub>0.9</sub> Cs <sub>0.1</sub> Co <sub>2</sub> O <sub>5+δ</sub> )                                                                                                | 0.162                                 | 0.275  | 0.531  | 1.526               | <i>ACS Energy Lett.</i> , <b>2023</b> , 8, 4145-4155 <sup>47</sup>      |

<sup>[a]</sup> N.A. = Not available

**Table S2.** Summary of fuel-cell mode performance for the B<sub>1.02</sub>F-CC and other high-performance air electrodes reported recently.

| Air electrode                                                                                                                                                                     | $P_{\max}$ (W cm <sup>-2</sup> ) |        |        |                     | Ref.                                                                   |
|-----------------------------------------------------------------------------------------------------------------------------------------------------------------------------------|----------------------------------|--------|--------|---------------------|------------------------------------------------------------------------|
|                                                                                                                                                                                   | 650 °C                           | 600 °C | 550 °C | 500 °C              |                                                                        |
| B <sub>1.02</sub> F-CC                                                                                                                                                            | 1.46                             | 1.06   | 0.68   | 0.38                | This work                                                              |
| BCeFNb<br>(BaCe <sub>0.1</sub> Fe <sub>0.8</sub> Nb <sub>0.1</sub> O <sub>3-δ</sub> )                                                                                             | 1.091                            | 0.82   | 0.559  | 0.324               | <i>Adv. Funct. Mater.</i> ,<br><b>2025</b> , 35, 2502771 <sup>62</sup> |
| BSCsCFZ<br>(Ba <sub>0.4</sub> Sr <sub>0.5</sub> Cs <sub>0.1</sub> Co <sub>0.7</sub> Fe <sub>0.2</sub> Zr <sub>0.1</sub> O <sub>3-δ</sub> )                                        | 1.240                            | 0.936  | 0.638  | 0.338               | <i>Adv. Funct. Mater.</i> ,<br><b>2025</b> , 35, 2422531 <sup>57</sup> |
| BSCFeEr<br>(Ba <sub>0.5</sub> Sr <sub>0.5</sub> (Co <sub>0.8</sub> Fe <sub>0.2</sub> ) <sub>0.9</sub> Er <sub>0.1</sub> O <sub>3-δ</sub> )                                        | 1.327                            | 0.984  | 0.701  | 0.525               | <i>Adv. Funct. Mater.</i> ,<br><b>2024</b> , 34, 2311140 <sup>60</sup> |
| MCsCO-CO<br>(Mn <sub>0.9</sub> Cs <sub>0.1</sub> Co <sub>2</sub> O <sub>4-δ</sub> -Co <sub>3</sub> O <sub>4</sub> )                                                               | 1.34                             | 0.97   | 0.62   | 0.28                | <i>Adv. Mater.</i> , <b>2024</b> ,<br>36, 2408044 <sup>50</sup>        |
| NiO-XFN<br>(xNiO-<br>Pr <sub>0.2</sub> La <sub>0.2</sub> Ba <sub>0.2</sub> Sr <sub>0.2</sub> Ca <sub>0.2</sub> Fe <sub>0.8</sub> Ni <sub>0.2-x</sub> O <sub>3-δ</sub> )           | 1.30                             | 0.79   | 0.43   | N.A. <sup>[a]</sup> | <i>Adv. Energy Mater.</i> ,<br><b>2025</b> , 15, 2405466 <sup>41</sup> |
| PNC-LSCF<br>(Pr <sub>2</sub> Ni <sub>0.5</sub> Co <sub>0.5</sub> O <sub>4-δ</sub> -<br>La <sub>0.6</sub> Sr <sub>0.4</sub> Co <sub>0.2</sub> Fe <sub>0.8</sub> O <sub>3-δ</sub> ) | 1.291                            | 1.023  | 0.662  | N.A.                | <i>Adv. Energy Mater.</i> ,<br><b>2025</b> , 15, 2403335 <sup>51</sup> |
| BSCFW@PBSCF<br>((Ba/Sr)(Co/Fe/W)O <sub>3-δ</sub> )@PrBa <sub>0.5</sub> Sr <sub>0.5</sub> C<br>O <sub>1.5</sub> Fe <sub>0.5</sub> O <sub>5+δ</sub> )                               | 1.32                             | 0.90   | 0.57   | N.A.                | <i>Adv. Mater.</i> , <b>2024</b> ,<br>36, 2405052 <sup>61</sup>        |
| BGCO<br>(Ba <sub>1+x</sub> Gd <sub>1-x</sub> Co <sub>2</sub> O <sub>6-δ</sub> )                                                                                                   | 0.872                            | 0.604  | 0.386  | 0.189               | <i>Adv. Energy Mater.</i> ,<br><b>2024</b> , 14, 2400319 <sup>59</sup> |
| SCNb-PSCNb<br>(SrCo <sub>0.5</sub> Nb <sub>0.5</sub> O <sub>3-δ</sub> -PrSrCo <sub>1.8</sub> Nb <sub>0.2</sub> O <sub>6-δ</sub> )                                                 | 1.30                             | 0.94   | 0.60   | N.A.                | <i>ACS Nano</i> , <b>2024</b> ,<br>18, 5141-5151 <sup>58</sup>         |
| 2Ru-BCeF<br>(BaCe <sub>0.125</sub> Fe <sub>0.875</sub> O <sub>3-δ</sub> with 2 wt.% Ru)                                                                                           | 1.38                             | 0.97   | 0.58   | N.A.                | <i>Adv. Mater.</i> , <b>2025</b> ,<br>37, 2501387 <sup>26</sup>        |

<sup>[a]</sup> N.A. = Not available

**Table S3.** Summary of electrolysis mode performance for the B<sub>1.02</sub>F-CC and other high-performance air electrodes reported recently.

| Air electrode                                                                                                                                                           | Current densities at 1.3 V(A cm <sup>-2</sup> ) |        |        |                     | Ref.                                                                   |
|-------------------------------------------------------------------------------------------------------------------------------------------------------------------------|-------------------------------------------------|--------|--------|---------------------|------------------------------------------------------------------------|
|                                                                                                                                                                         | 650 °C                                          | 600 °C | 550 °C | 500 °C              |                                                                        |
| B <sub>1.02</sub> F-CC                                                                                                                                                  | -2.81                                           | -1.72  | -0.90  | -0.40               | This work                                                              |
| SFMo-0.05SnO <sub>2</sub><br>(Sr <sub>2</sub> Fe <sub>1.5</sub> Mo <sub>0.5</sub> O <sub>6-δ</sub> -0.05SnO <sub>2</sub> )                                              | -2.09                                           | -1.40  | -0.57  | -0.25               | <i>Adv. Funct. Mater.</i> ,<br><b>2025</b> , 36, e17821 <sup>66</sup>  |
| NiO-XFN<br>(xNiO-<br>Pr <sub>0.2</sub> La <sub>0.2</sub> Ba <sub>0.2</sub> Sr <sub>0.2</sub> Ca <sub>0.2</sub> Fe <sub>0.8</sub> Ni <sub>0.2-x</sub> O <sub>3-δ</sub> ) | -2.52                                           | -1.70  | -0.92  | N.A. <sup>[a]</sup> | <i>Adv. Energy Mater.</i> ,<br><b>2025</b> , 15, 2405466 <sup>41</sup> |
| BCFZYCe-CeO <sub>2</sub><br>(Ce-doped BaCo <sub>0.4</sub> Fe <sub>0.4</sub> Zr <sub>0.1</sub> Y <sub>0.1</sub> O <sub>3-δ</sub><br>with exsolved CeO <sub>2</sub> )     | -1.47                                           | -1.16  | -0.73  | -0.42               | <i>Adv. Funct. Mater.</i> ,<br><b>2025</b> , 36, e16197 <sup>64</sup>  |
| MCsCO-CO<br>(Mn <sub>0.9</sub> Cs <sub>0.1</sub> Co <sub>2</sub> O <sub>4-δ</sub> -Co <sub>3</sub> O <sub>4</sub> )                                                     | -2.48                                           | -1.45  | -0.56  | -0.24               | <i>Adv. Mater.</i> , <b>2024</b> , 36,<br>2408044 <sup>50</sup>        |
| BSCsCFZ<br>(Ba <sub>0.4</sub> Sr <sub>0.5</sub> Cs <sub>0.1</sub> Co <sub>0.7</sub> Fe <sub>0.2</sub> Zr <sub>0.1</sub> O <sub>3-δ</sub> )                              | -1.98                                           | -1.23  | -0.787 | N.A.                | <i>Adv. Funct. Mater.</i> ,<br><b>2025</b> , 35, 2422531 <sup>57</sup> |
| HE-PBSLcCaC<br>(High-entropy<br>Pr <sub>0.2</sub> Ba <sub>0.2</sub> Sr <sub>0.2</sub> La <sub>0.2</sub> Ca <sub>0.2</sub> CoO <sub>3-δ</sub> )                          | -2.68                                           | -1.75  | -0.80  | -0.28               | <i>Adv. Mater.</i> , <b>2023</b> , 35,<br>2209469 <sup>46</sup>        |
| bs-PBSCF<br>(Ba/Sr-deficient<br>Pr(Ba <sub>0.5</sub> Sr <sub>0.5</sub> ) <sub>0.95</sub> Co <sub>1.5</sub> Fe <sub>0.5</sub> O <sub>5+δ</sub> )                         | N.A.                                            | -1.28  | -0.822 | -0.511              | <i>Adv. Mater.</i> , <b>2025</b> , 37,<br>e11519 <sup>65</sup>         |
| CCS-PBN<br>(Conformally coated scaffold-<br>Pr <sub>1.8</sub> Ba <sub>0.2</sub> NiO <sub>4.1</sub> )                                                                    | -2.4                                            | -1.46  | -0.68  | N.A.                | <i>Nat. Energy</i> , <b>2025</b> , 10,<br>890-903 <sup>29</sup>        |
| PBSCN20<br>(PrBa <sub>0.5</sub> Sr <sub>0.5</sub> Co <sub>1.8</sub> Ni <sub>0.2</sub> O <sub>5+δ</sub> )                                                                | N.A.                                            | -1.72  | N.A.   | -0.41               | <i>Adv. Funct. Mater.</i> ,<br><b>2025</b> , 35, 2508758 <sup>63</sup> |
| BSCFEr<br>(Ba <sub>0.5</sub> Sr <sub>0.5</sub> (Co <sub>0.8</sub> Fe <sub>0.2</sub> ) <sub>0.9</sub> Er <sub>0.1</sub> O <sub>3-δ</sub> )                               | -2.23                                           | -1.54  | -1.05  | -0.56               | <i>Adv. Funct. Mater.</i> ,<br><b>2024</b> , 34, 2311140 <sup>60</sup> |

<sup>[a]</sup> N.A. = Not available
